# Supplementary material for: Impact of RTS,S/AS02A and RTS,S/AS01B on Genotypes of P. falciparum in Adults Participating in a Malaria Vaccine Clinical Trial
Source: PubMed Central journal article supplement (PMC2773849; doi:10.1371/journal.pone.0007849), 2009-11-17
Supplement: pone.0007849.s002.pdf [file pone.0007849.s002.pdf]

**Supplementary Table S1. CSP 3D7/non 3D7 type by polymorphic amino acid site in Th2r (single+majority) (ATP cohort for efficacy)**

| Characteristics | Parameters or Categories | Gr 0<br>N = 38 |      | Gr 1<br>N = 15 |      | Gr 2<br>N = 23 |      | Gr 3<br>N = 31 |      | P-value (Fisher) |                 |                 |
|-----------------|--------------------------|----------------|------|----------------|------|----------------|------|----------------|------|------------------|-----------------|-----------------|
|                 |                          | Value or n     | %    | Value or n     | %    | Value or n     | %    | Value or n     | %    | Pooled-Control   | AS01B - Control | AS02A - Control |
| K329            | Not 3D7                  | 16             | 42.1 | 8              | 53.3 | 8              | 34.8 | 14             | 45.2 |                  |                 |                 |
|                 | 3D7                      | 22             | 57.9 | 7              | 46.7 | 15             | 65.2 | 17             | 54.8 | 0.8123           | 0.7549          | 0.5772          |
| K332            | Not 3D7                  | 35             | 92.1 | 15             | 100  | 20             | 87.0 | 27             | 87.1 |                  |                 |                 |
|                 | 3D7                      | 3              | 7.9  | 0              | 0.0  | 3              | 13.0 | 4              | 12.9 | 0.6925           | 0.2876          | 1               |
| E333            | Not 3D7                  | 32             | 84.2 | 15             | 100  | 17             | 73.9 | 24             | 77.4 |                  |                 |                 |
|                 | 3D7                      | 6              | 15.8 | 0              | 0.0  | 6              | 26.1 | 7              | 22.6 | 0.5446           | 0.0782          | 1               |
| L335            | Not 3D7                  | 0              | 0.0  | 0              | 0.0  | 0              | 0.0  | 1              | 3.2  |                  |                 |                 |
|                 | 3D7                      | 38             | 100  | 15             | 100  | 23             | 100  | 30             | 96.8 | 0.4493           | 1               | 1               |
| N336            | Not 3D7                  | 34             | 89.5 | 15             | 100  | 19             | 82.6 | 27             | 87.1 |                  |                 |                 |
|                 | 3D7                      | 4              | 10.5 | 0              | 0.0  | 4              | 17.4 | 4              | 12.9 | 1                | 0.2876          | 0.7108          |
| K337            | Not 3D7                  | 28             | 73.7 | 14             | 93.3 | 14             | 60.9 | 21             | 67.7 |                  |                 |                 |
|                 | 3D7                      | 10             | 26.3 | 1              | 6.7  | 9              | 39.1 | 10             | 32.3 | 0.6055           | 0.0737          | 0.7739          |
| Q339            | Not 3D7                  | 16             | 42.1 | 8              | 53.3 | 8              | 34.8 | 6              | 19.4 |                  |                 |                 |
|                 | 3D7                      | 22             | 57.9 | 7              | 46.7 | 15             | 65.2 | 25             | 80.6 | 0.0684           | 0.0377          | 0.2259          |
| L342            | Not 3D7                  | 7              | 18.4 | 0              | 0.0  | 7              | 30.4 | 4              | 12.9 |                  |                 |                 |
|                 | 3D7                      | 31             | 81.6 | 15             | 100  | 16             | 69.6 | 27             | 87.1 | 0.7428           | 0.2876          | 0.1728          |

Gr.0 = Pooled RTS,S

Gr.1 = RTS,S/AS01<sub>B</sub>

Gr.2 = RTS,S/AS02<sub>A</sub>

Gr.3 = Rabies vaccine

N = number of subjects

n = number of subjects in a given category

Value = value of the considered parameter

% = n / Number of subjects with available results x 100
