# Supplementary material for: Impact of RTS,S/AS02A and RTS,S/AS01B on Genotypes of P. falciparum in Adults Participating in a Malaria Vaccine Clinical Trial
Source: PubMed Central journal article supplement (PMC2773849; doi:10.1371/journal.pone.0007849), 2009-11-17
Supplement: pone.0007849.s003.pdf [file pone.0007849.s003.pdf]

**Supplementary Table S2. CSP 3D7/non 3D7 type by polymorphic amino acid site in Th3r (single+majority) (ATP cohort for efficacy)**

| Characteristics | Parameters or Categories | Gr 0<br>N = 38 |      | Gr 1<br>N = 15 |      | Gr 2<br>N = 23 |      | Gr 3<br>N = 31 |      | P-value (Fisher) |                 |                 |
|-----------------|--------------------------|----------------|------|----------------|------|----------------|------|----------------|------|------------------|-----------------|-----------------|
|                 |                          | Value or n     | %    | Value or n     | %    | Value or n     | %    | Value or n     | %    | Pooled-Control   | AS01B - Control | AS02A - Control |
| N367            | Not 3D7                  | 6              | 15.8 | 1              | 6.7  | 5              | 21.7 | 11             | 35.5 |                  |                 |                 |
|                 | 3D7                      | 32             | 84.2 | 14             | 93.3 | 18             | 78.3 | 20             | 64.5 | 0.0912           | 0.0702          | 0.3701          |
| P369            | Not 3D7                  | 1              | 2.6  | 0              | 0.0  | 1              | 4.3  | 3              | 9.7  |                  |                 |                 |
|                 | 3D7                      | 37             | 97.4 | 15             | 100  | 22             | 95.7 | 28             | 90.3 | 0.3194           | 0.5405          | 0.6280          |
| D371            | Not 3D7                  | 1              | 2.6  | 0              | 0.0  | 1              | 4.3  | 7              | 22.6 |                  |                 |                 |
|                 | 3D7                      | 37             | 97.4 | 15             | 100  | 22             | 95.7 | 24             | 77.4 | 0.0187           | 0.0782          | 0.1186          |
| E372            | Not 3D7                  | 29             | 76.3 | 13             | 86.7 | 16             | 69.6 | 21             | 67.7 |                  |                 |                 |
|                 | 3D7                      | 9              | 23.7 | 2              | 13.3 | 7              | 30.4 | 10             | 32.3 | 0.5887           | 0.2846          | 1               |
| D374            | Not 3D7                  | 4              | 10.5 | 1              | 6.7  | 3              | 13.0 | 3              | 9.7  |                  |                 |                 |
|                 | 3D7                      | 34             | 89.5 | 14             | 93.3 | 20             | 87.0 | 28             | 90.3 | 1                | 1               | 1               |
| A376            | Not 3D7                  | 21             | 55.3 | 7              | 46.7 | 14             | 60.9 | 20             | 64.5 |                  |                 |                 |
|                 | 3D7                      | 17             | 44.7 | 8              | 53.3 | 9              | 39.1 | 11             | 35.5 | 0.4699           | 0.3412          | 1               |

Gr.0 = Pooled RTS,S

Gr.1 = RTS,S/AS01<sub>B</sub>

Gr.2 = RTS,S/AS02<sub>A</sub>

Gr.3 = Rabies vaccine

N = number of subjects

n = number of subjects in a given category

Value = value of the considered parameter

% = n / Number of subjects with available results x 100
