# Supplementary material for: Impact of RTS,S/AS02A and RTS,S/AS01B on Genotypes of P. falciparum in Adults Participating in a Malaria Vaccine Clinical Trial
Source: PubMed Central journal article supplement (PMC2773849; doi:10.1371/journal.pone.0007849), 2009-11-17
Supplement: pone.0007849.s004.pdf [file pone.0007849.s004.pdf]

**Th2R  
haplotypes**

| Pre-vaccination July 05 |            |            |  |      |      |      |      |      |      |      | ADI Oct 05-Dec 06 |              |           |            |
|-------------------------|------------|------------|--|------|------|------|------|------|------|------|-------------------|--------------|-----------|------------|
| Th2                     | Freq       | Percent    |  | K329 | K332 | E333 | L335 | N336 | K337 | Q339 | L342              | Th2          | Freq.     | Percent    |
| 00000111                | 0          | 0          |  |      |      |      |      |      |      |      |                   | 00000111     | 1         | 1.23       |
| 00010001                | 7          | 4.79       |  |      |      |      |      |      |      |      |                   | 00010001     | 5         | 6.17       |
| 00010011                | 22         | 15.07      |  |      |      |      |      |      |      |      |                   | 00010011     | 20        | 24.69      |
| 00010111                | 6          | 4.11       |  |      |      |      |      |      |      |      |                   | 00010111     | 6         | 7.41       |
| 00011101                | 6          | 4.11       |  |      |      |      |      |      |      |      |                   | 00011101     | 1         | 1.23       |
| 10010001                | 15         | 10.27      |  |      |      |      |      |      |      |      |                   | 10010001     | 12        | 14.81      |
| 10010011                | 25         | 17.12      |  |      |      |      |      |      |      |      |                   | 10010011     | 14        | 17.28      |
| 10010100                | 4          | 2.74       |  |      |      |      |      |      |      |      |                   | 10010100     | 3         | 3.7        |
| 10010111                | 49         | 33.56      |  |      |      |      |      |      |      |      |                   | 10010111     | 0         | 0          |
| 10011100                | 1          | 0.68       |  |      |      |      |      |      |      |      |                   | 10011100     | 3         | 3.7        |
| 10110011                | 2          | 1.37       |  |      |      |      |      |      |      |      |                   | 10110011     | 3         | 3.7        |
| 10110100                | 4          | 2.74       |  |      |      |      |      |      |      |      |                   | 10110100     | 2         | 2.47       |
| 10110111                | 0          | 0          |  |      |      |      |      |      |      |      |                   | 10110111     | 2         | 2.47       |
| 11110011                | 2          | 1.37       |  |      |      |      |      |      |      |      |                   | 11110011     | 2         | 2.47       |
| 11111110                | 2          | 1.37       |  |      |      |      |      |      |      |      |                   | 11111110     | 7         | 8.64       |
| 11111111                | 1          | 0.68       |  |      |      |      |      |      |      |      |                   | 11111111     | 0         | 0          |
| <b>Total</b>            | <b>146</b> | <b>100</b> |  |      |      |      |      |      |      |      |                   | <b>Total</b> | <b>81</b> | <b>100</b> |

**Th3R  
haplotypes**

| Pre-vaccination July 05 |            |            |  |      |      |      |      |      | ADI Oct 05-Dec 06 |              |           |            |
|-------------------------|------------|------------|--|------|------|------|------|------|-------------------|--------------|-----------|------------|
| Th3                     | Freq.      | Percent    |  | N367 | P369 | D371 | E372 | D374 | A376              | Th3          | Freq.     | Percent    |
| 000110                  | 2          | 1.37       |  |      |      |      |      |      |                   | 000110       | 5         | 6.17       |
| 001110                  | 1          | 0.68       |  |      |      |      |      |      |                   | 001110       | 0         | 0          |
| 010100                  | 2          | 1.37       |  |      |      |      |      |      |                   | 010100       | 1         | 1.23       |
| 010110                  | 2          | 1.37       |  |      |      |      |      |      |                   | 010110       | 4         | 4.94       |
| 011010                  | 0          | 0          |  |      |      |      |      |      |                   | 011010       | 4         | 4.94       |
| 011011                  | 5          | 3.42       |  |      |      |      |      |      |                   | 011011       | 5         | 6.17       |
| 011111                  | 2          | 1.37       |  |      |      |      |      |      |                   | 011111       | 1         | 1.23       |
| 111000                  | 5          | 3.42       |  |      |      |      |      |      |                   | 111000       | 2         | 2.47       |
| 111010                  | 29         | 19.86      |  |      |      |      |      |      |                   | 111010       | 23        | 28.4       |
| 111011                  | 37         | 25.34      |  |      |      |      |      |      |                   | 111011       | 24        | 29.63      |
| 111100                  | 4          | 2.74       |  |      |      |      |      |      |                   | 111100       | 6         | 7.41       |
| 111110                  | 55         | 37.67      |  |      |      |      |      |      |                   | 111110       | 5         | 6.17       |
| 111111                  | 2          | 1.37       |  |      |      |      |      |      |                   | 111111       | 1         | 1.23       |
| <b>Total</b>            | <b>146</b> | <b>100</b> |  |      |      |      |      |      |                   | <b>Total</b> | <b>81</b> | <b>100</b> |

**Supplementary Table 3: Th2R and Th3R haplotype prevalence at baseline and among ADI samples.**

Binary codes for each haplotype are given. in vertical columns; polymorphic codons in each epitope are set out along the top of each table. Shaded cells indicate that the 3D7 allele is present at that position.
